# Supplementary material for: Development and analysis of the Soil Water Infiltration Global database
Source: Copernicus journal article supplement (doi:10.5194/essd-10-1237-2018), 2018-07-10
Supplement: Supplementary file 1 [file essd-10-1237-2018-supplement.zip]

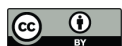

## *Supplement of*

# **Development and analysis of the Soil Water Infiltration Global database**

**Mehdi Rahmati et al.**

*Correspondence to:* Mehdi Rahmati (mehdirmti@gmail.com)

- [essd-10-1237-2018-supplement-title-page.pdf](#)
- [SWIG-database.7z](#)
- [Supplement.docx](#)

The copyright of individual parts of the supplement might differ from the CC BY 4.0 License.
